# Supplementary material for: Human Supernumerary Teeth-Derived Apical Papillary Stem Cells Possess Preferable Characteristics and Efficacy on Hepatic Fibrosis in Mice
Source: Hindawi journal article supplement (doi:10.1155/2020/6489396), 2020-01-30
Supplement: f1 [file 6489396.f1.pdf]

# **Human Supernumerary Teeth-derived Apical Papillary Stem Cells Possess Preferable Characteristics and Efficacy on Hepatic Fibrosis in Mice**

Jun Yao,<sup>1</sup> Nan Chen,<sup>1</sup> Xiaojing Wang,<sup>1</sup> Leisheng Zhang,<sup>2,3,4,\*</sup> Jiali Huo,<sup>4</sup> Ying Chi,<sup>4</sup>  
Zongjin Li,<sup>3</sup> and Zhongchao Han<sup>4</sup>

<sup>1</sup> School and Hospital of Stomatology, Fujian Medical University, Fuzhou, China.

<sup>2</sup> The Postdoctoral Research Station of Medicine College, Nankai University, Tianjin, China.

<sup>3</sup> Precision Medicine Division, Health-Biotech (Tianjin) Stem Cell Research Institute Co., Ltd., Tianjin, 301700, China.

<sup>4</sup> State Key Laboratory of Experimental Hematology and Institute of Hematology & Blood Diseases Hospital, Chinese Academy of Medical Sciences & Peking Union Medical College, Tianjin, China.

**E-mail Address of all the listed co-authors** (Not all the co-authors have full institutional mailing addresses):

Jun Yao, [dentyao@163.com](mailto:dentyao@163.com);

Nan Chen, [398577287@qq.com](mailto:398577287@qq.com);

Xiaojing Wang, [wangxj2925@foxmail.com](mailto:wangxj2925@foxmail.com);

Leisheng Zhang, [zhangleisheng@health-biotech.com](mailto:zhangleisheng@health-biotech.com);

Jiali Huo, [huojiali1990@163.com](mailto:huojiali1990@163.com);

Ying Chi, [chiying@ihcams.ac.cn](mailto:chiying@ihcams.ac.cn);

Zongjin Li, [zongjinli@nankai.edu.cn](mailto:zongjinli@nankai.edu.cn);

Zhongchao Han, [hanzhongchao@health-biotech.com](mailto:hanzhongchao@health-biotech.com).

\* Corresponding author: Leisheng Zhang

**Correspondence should be addressed to** Leisheng Zhang; [zhangleisheng@health-biotech.com](mailto:zhangleisheng@health-biotech.com)

## Supplementary Materials

Supplementary Table 1: The antibodies for flow cytometry analysis.

| Antioody              | Cat. NO.   | Source       |
|-----------------------|------------|--------------|
| Anti-human CD31-PE    | 555446     | BD Pharmigen |
| Anti- human CD34-APC  | 555824     | BD Pharmigen |
| Anti-human CD44-PE    | 550989     | BD Pharmigen |
| Anti- human CD45-PE   | 560975     | BD Pharmigen |
| Anti- human CD73-PE   | 550257     | BD Pharmigen |
| Anti- human CD90-APC  | 328113     | BioLegend    |
| Anti- human CD105-APC | 323208     | BioLegend    |
| Anti-human HLA-DR-Cy7 | 25-9956-71 | eBioscience  |

Supplementary Table 2: The primer sequences of indicated genes for quantitative RT-PCR analysis.

| Gene          | Forward Primer          | Reverse Primer           |
|---------------|-------------------------|--------------------------|
| <i>OCN</i>    | CACTCCTCGCCCTATTGGC     | CCCTCCTGCTTGGACACAAAG    |
| <i>RUNX2</i>  | CTCACTACCACACCTACCTG    | TCAATATGGTCGCCAAACAGATTC |
| <i>BMP4</i>   | ATGATTCTGGTAACCGAATGC   | CCCCGTCTCAGGTATCAAACCT   |
| <i>ALP</i>    | GAGATGTTGTCCTGACACTTGTG | AGGCTTCCTCCTTGTGTTGGGT   |
| <i>COL1A1</i> | GAGGGCCAAGACGAAGACATC   | CAGATCACGTCATCGCACAAAC   |
| <i>OPN</i>    | CTCCATTGACTCGAACGACTC   | CAGGTCTGCGAACTTCTTAGAT   |
| <i>Ck-18</i>  | CAGCCAGCGTCTATGCAGG     | CCTTCTCGGTCTGGATTCCAC    |
| <i>Ck19</i>   | GTTTCAGTACGCATTGGGTCAG  | GAGGACGAGGTCACGAAGC      |
| <i>Hgf</i>    | ACTTCTGCCGGTCCTGTTG     | CCCCTGTTCTCTGATACACCT    |
